# Supplementary material for: Limited Impact of SARS-CoV-2 on the Human Naso-Oropharyngeal Microbiota in Hospitalized Patients
Source: PubMed Central journal article supplement (PMC9769582; doi:10.1128/spectrum.02196-22), 2022-11-09
Supplement: spectrum.02196-22-s0001.pdf [file spectrum.02196-22-s0001.pdf]

Supplemental Figures:

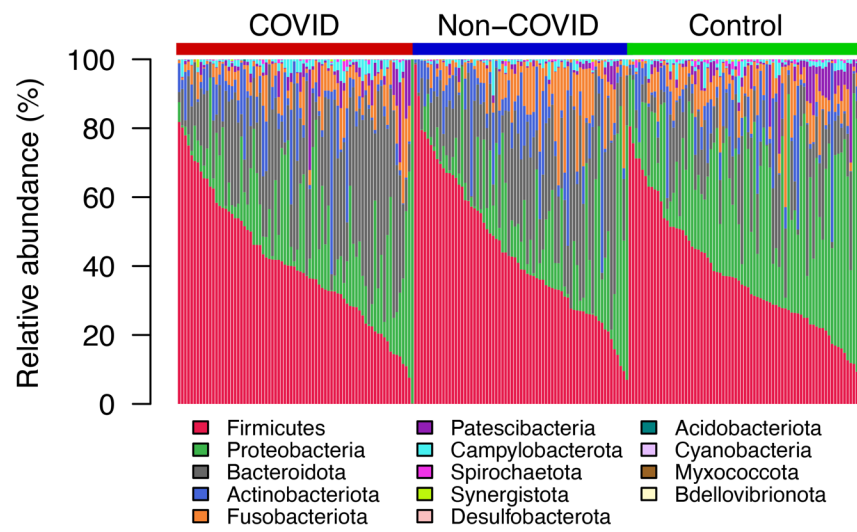

**FIG S1** Composition of the naso-oro-pharyngeal microbiota in each study subject summarized at the phylum level.

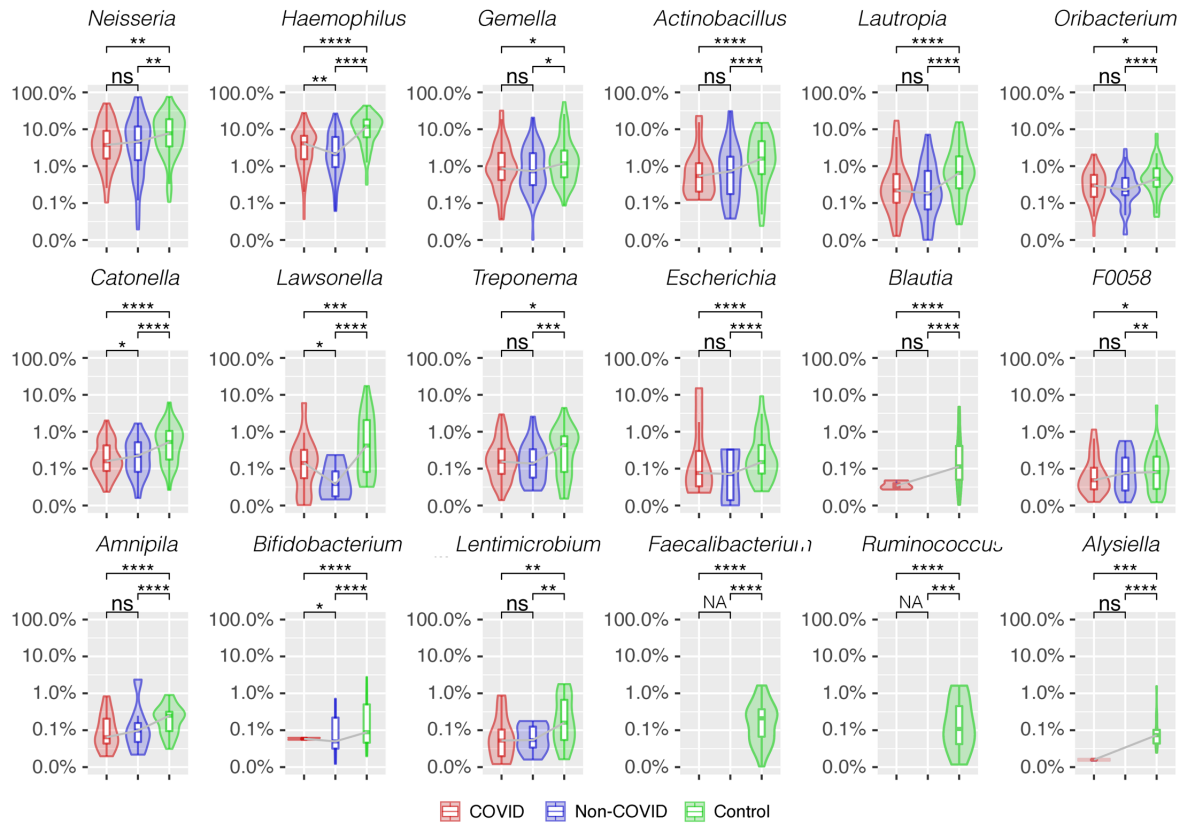

**FIG S2** Comparison of the relative abundance of discriminative bacterial genera significantly depressed in both hospitalized COVID and non-COVID patients when compared with local controls. \*\*,  $p < 0.01$ ; \*\*\*,  $p < 0.001$ ; \*\*\*\*,  $p < 0.0001$ ; ns, not significant.

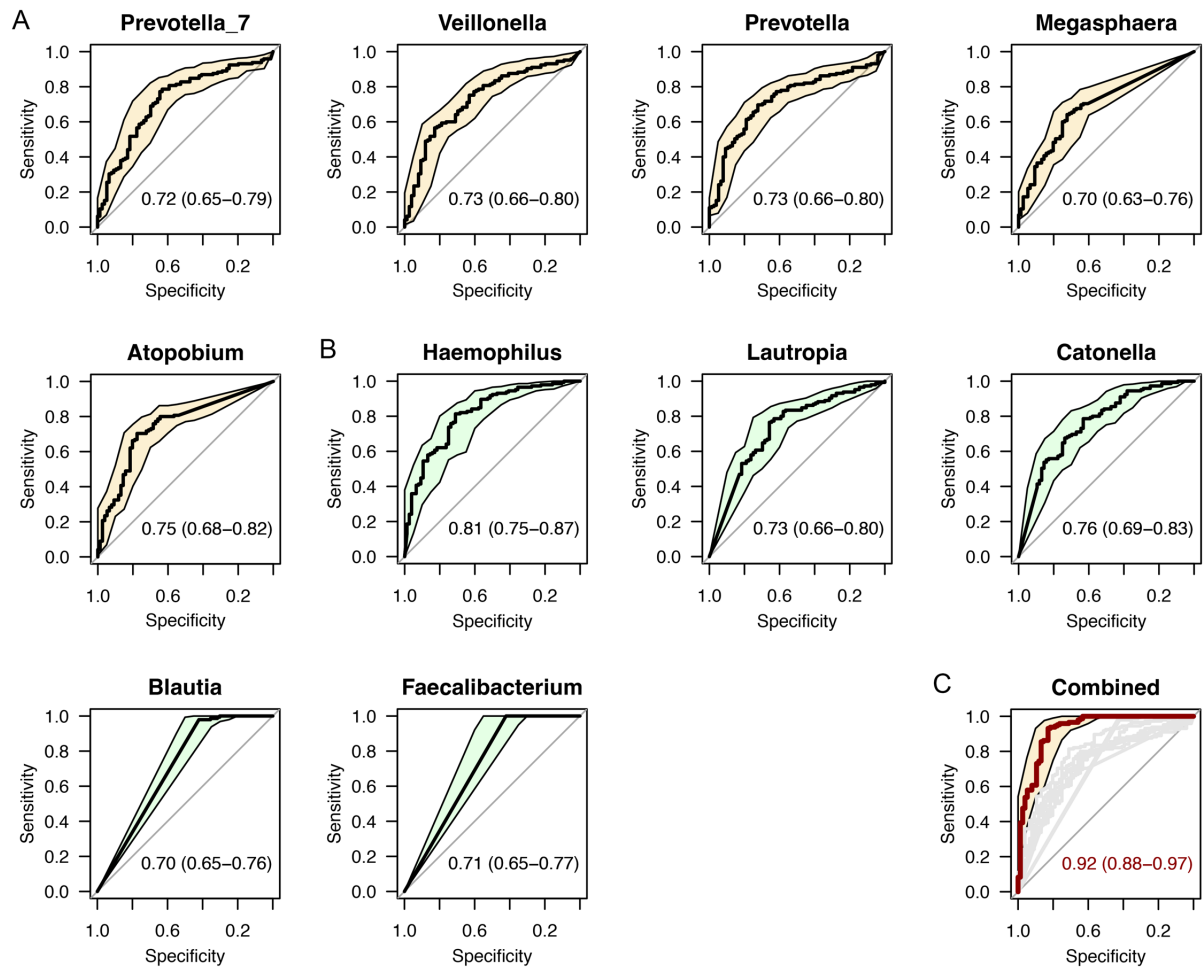

**FIG S3** Receiver operating characteristic (ROC) analysis with area under the receiver operating curve (AUC) values distinguishing hospitalized patients (COVID and non-COVID) from local controls. **(A)** Five enriched and **(B)** five depressed bacterial genera with AUC  $\geq 0.7$  in both COVID and non-COVID patients achieved a combined AUC value of 0.92 **(C)**.

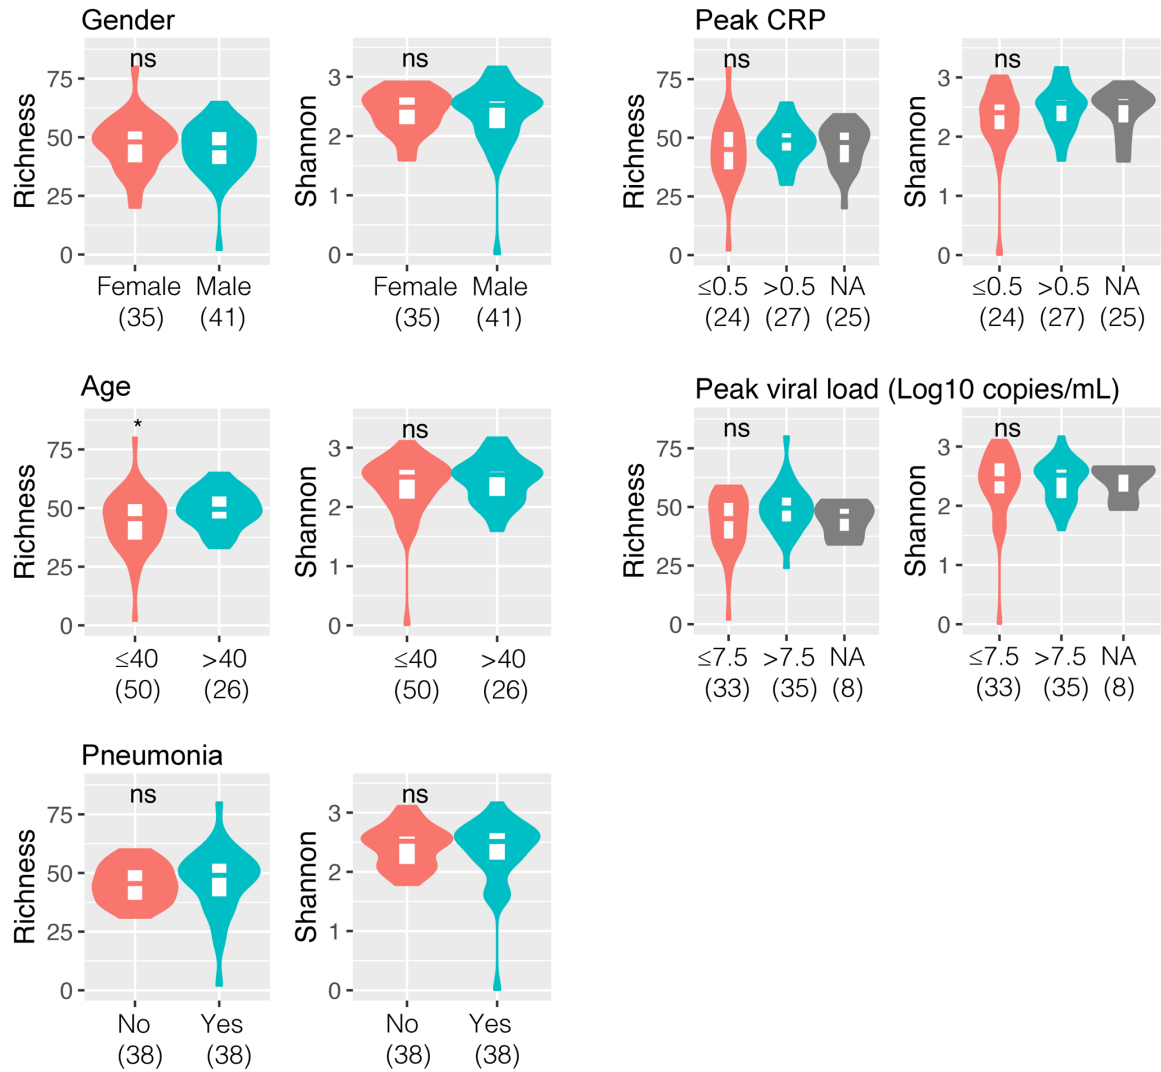

**FIG S4** Associations between demographic and clinical parameters and the alpha diversity of the naso-oro-pharyngeal microbiota in COVID patients. CRP, C-reactive protein; NA, not available. \*,  $p < 0.05$ ; ns, not significant.

|            | Df | SumOfSqs | R2      | F      | Pr(>F)  |
|------------|----|----------|---------|--------|---------|
| Pneumonia  | 1  | 0.1444   | 0.01133 | 0.8613 | 0.613   |
| Age        | 1  | 0.3315   | 0.02603 | 1.9779 | 0.020 * |
| Sex        | 1  | 0.1847   | 0.01450 | 1.1019 | 0.303   |
| loadSample | 2  | 0.3652   | 0.02867 | 1.0893 | 0.312   |
| loadPeak   | 2  | 0.3477   | 0.02730 | 1.0372 | 0.383   |
| crp        | 2  | 0.3021   | 0.02372 | 0.9012 | 0.609   |
| Residual   | 66 | 11.0631  | 0.86846 |        |         |
| Total      | 75 | 12.7387  | 1.00000 |        |         |

**FIG S5** PERMANOVA results inferred from weighted UniFrac distance shows no relationship between the beta diversity of the naso-oropharyngeal microbiota in COVID patients and most host variables except age. CRP, C-reactive protein. \*,  $p < 0.05$ .
